# Supplementary material
Source: publisher figshare collection journal article supplement (https://tandf.figshare.com/articles/dataset/_/1319442)
Supplement: Supplementary file 2 [file 2]

**$\delta^{15}\text{N}$  (‰) in 2002**  
(Ave. 6.09, CV = 9.0%)

|      |      |      |      |
|------|------|------|------|
| 6.65 | 6.19 | 5.59 | 5.52 |
| 6.38 | 6.43 | 6.04 | 5.46 |
| 6.42 | 6.92 | 6.81 | 5.66 |
| 6.74 | 5.77 | 5.59 | 5.22 |

Northings (m)

**$\delta^{15}\text{N}$  (‰) in 2012**  
(Ave. 5.75, CV = 8.0%)

|      |      |      |      |
|------|------|------|------|
| 5.70 | 5.58 | 5.37 | 5.12 |
| 5.76 | 6.24 | 5.63 | 5.35 |
| 5.90 | 6.94 | 6.47 | 5.54 |
| 5.56 | 5.71 | 5.51 | 5.55 |

Easting (m)

Figure S2: Spatial distributions of the  $\delta^{15}\text{N}$  values for selected samples collected in 2002 and 2012. The soil sampling points are shown in Figure 1.
