# Supplementary material
Source: publisher figshare collection journal article supplement (https://tandf.figshare.com/articles/dataset/_/1319442)

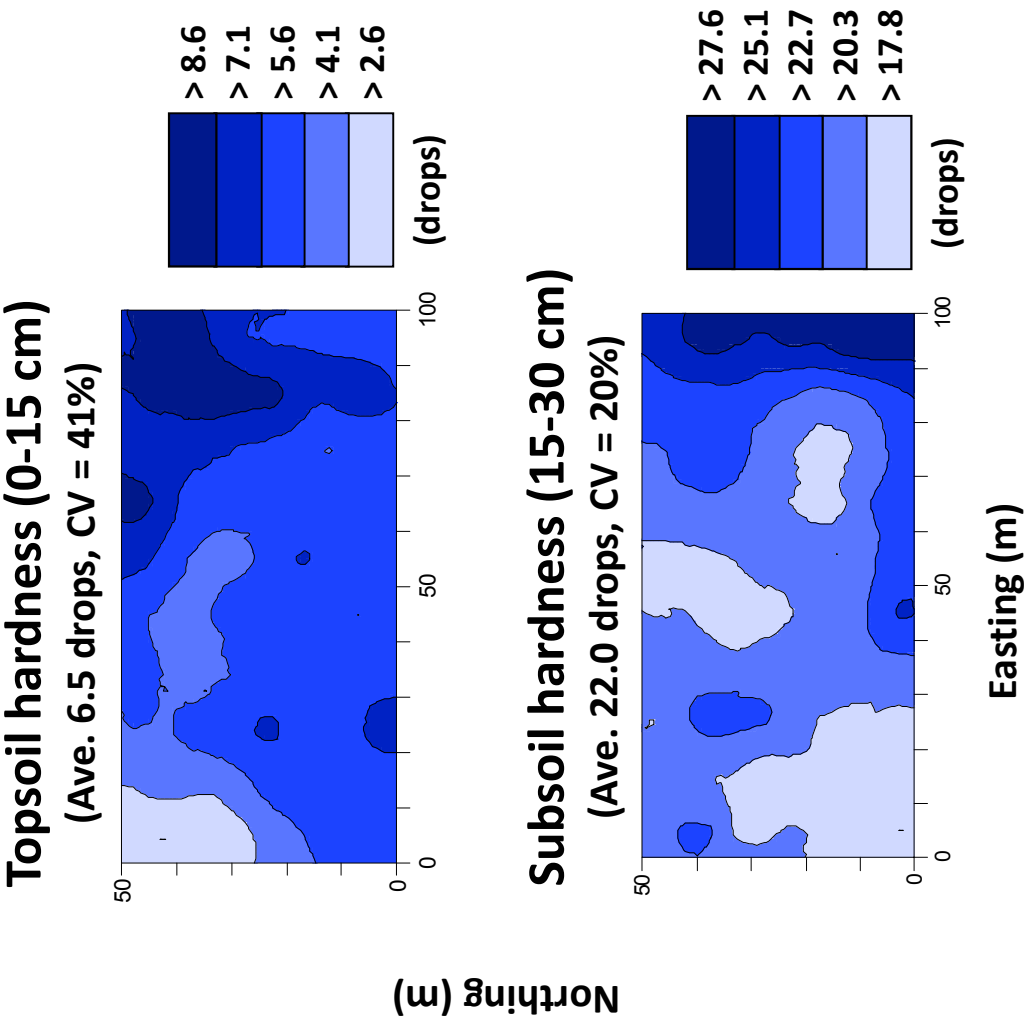

Figure S1: Spatial distributions of hardness of surface and subsurface soils measured in 2012.

Supplement: Supplementary file 1 [file 2]
